# Supplementary material for: Insight into the photocatalytic mechanism of the optimalxvalue in the BiOBrxI1−x, BiOClxI1−xand BiOClxBr1−xseries varying with pollutant type
Source: Royal Society of Chemistry journal article supplement (doi:10.1039/d2nr03726b), 2022-01-01
Supplement: d2nr03726b1.pdf [file d2nr03726b1.pdf]

## Insight into the photocatalytic mechanism of the optimal $x$ value in $\text{BiOBr}_x\text{I}_{1-x}$ , $\text{BiOCl}_x\text{I}_{1-x}$ and $\text{BiOCl}_x\text{Br}_{1-x}$ series varying with pollutant type

Ruixin Lu, Abdul Hannan Zahid, Qiaofeng Han<sup>□</sup>

*Key Laboratory for Soft Chemistry and Functional Materials, Ministry of Education, Nanjing University of Science and Technology, Nanjing 210094, China*

**Figure S1** EDS spectra of  $\text{BiOBr}_{0.5}\text{I}_{0.5}$  (a) and  $\text{BiOBr}_{0.95}\text{I}_{0.05}$  (b)

**Table S1** Apparent rate constant ( $k$ ) of MG photodegradation on  $\text{BiOBr}_x\text{I}_{1-x}$  with different  $x$  values

|                           |         |         |         |         |         |
|---------------------------|---------|---------|---------|---------|---------|
| $x$ values                | 0       | 0.05    | 0.25    | 0.4     | 0.5     |
| $k$ ( $\text{min}^{-1}$ ) | 0.01286 | 0.01634 | 0.01803 | 0.02050 | 0.03145 |
| $x$ values                | 0.6     | 0.75    | 0.875   | 0.95    | 1       |
| $k$ ( $\text{min}^{-1}$ ) | 0.01871 | 0.01723 | 0.01060 | 0.00661 | 0.00630 |

**Table S2** Apparent rate constant ( $k$ ) of TC photodegradation on  $\text{BiOBr}_x\text{I}_{1-x}$  with different  $x$  values

|                           |         |         |         |         |         |
|---------------------------|---------|---------|---------|---------|---------|
| $x$ values                | 0       | 0.05    | 0.25    | 0.4     | 0.5     |
| $k$ ( $\text{min}^{-1}$ ) | 0.00251 | 0.00452 | 0.00582 | 0.00735 | 0.01096 |
| $x$ values                | 0.6     | 0.75    | 0.875   | 0.95    | 1       |
| $k$ ( $\text{min}^{-1}$ ) | 0.01193 | 0.02535 | 0.03283 | 0.03739 | 0.01048 |

\* Corresponding author. E-mail: hanqiaofeng@njjust.edu.cn (Q. Han).

**Figure S2** Photocatalytic activity of  $\text{BiOBr}_x\text{I}_{1-x}$  for the degradation of  $20 \text{ mg L}^{-1}$  TC (a),  $10 \text{ mg L}^{-1}$  BPA (b),  $10 \text{ mg L}^{-1}$  MV (c) and  $20 \text{ mg L}^{-1}$  RhB (d) under visible light irradiation

**Figure S3** Photocatalytic activity of  $\text{BiOCl}_x\text{Br}_{1-x}$  for the degradation of  $20 \text{ mg L}^{-1}$  TC (a),  $20 \text{ mg L}^{-1}$  RhB (b),  $20 \text{ mg L}^{-1}$  MG (c) and  $20 \text{ mg L}^{-1}$  MV (d) under visible light irradiation

**Figure S4** Photocatalytic activity of  $\text{BiOCl}_x\text{I}_{1-x}$  for the degradation of  $20 \text{ mg L}^{-1}$  RhB (a),  $20 \text{ mg L}^{-1}$  TC (b),  $30 \text{ mg L}^{-1}$  MG (c) and  $20 \text{ mg L}^{-1}$  MV (d) under visible light irradiation

**Figure S5** Time-resolved spectral changes of TC (a), RhB (b) and MG (c) over  $\text{BiOBr}_x\text{I}_{1-x}$

**Table S3** Equilibrium adsorption capacity ( $q_e$ ) for MG adsorption by fresh and used  $\text{BiOBr}_x\text{I}_{1-x}$

| $x$ values                         | 0  | 0.25 | 0.5 | 0.75 | 0.95 | 1  |
|------------------------------------|----|------|-----|------|------|----|
| $q_e$ (Fresh, $\text{mg g}^{-1}$ ) | 32 | 35   | 29  | 28   | 25   | 21 |
| $q_e$ (Used, $\text{mg g}^{-1}$ )  | 20 | 21   | 19  | 16   | 14   | 13 |

**Table S4** Equilibrium adsorption capacity ( $q_e$ ) for TC adsorption by fresh and used  $\text{BiOBr}_x\text{I}_{1-x}$

| $x$ values                         | 0  | 0.25 | 0.5 | 0.75 | 0.95 | 1  |
|------------------------------------|----|------|-----|------|------|----|
| $q_e$ (Fresh, $\text{mg g}^{-1}$ ) | 15 | 20   | 27  | 28   | 26   | 23 |
| $q_e$ (Used, $\text{mg g}^{-1}$ )  | 5  | 11   | 18  | 19   | 18   | 14 |

**Fig. S6** Photocatalytic activity of fresh  $\text{BiOBr}_x\text{I}_{1-x}$  and  $\text{BiOBr}_x\text{I}_{1-x}$  after desorption for the degradation of  $20 \text{ mg L}^{-1}$  MG (a) and  $20 \text{ mg L}^{-1}$  TC (b)

**Fig. S7** Effect of contact time on the removal of  $20 \text{ mg L}^{-1}$  MG (a, b) and  $20 \text{ mg L}^{-1}$  TC (c, d) over fresh  $\text{BiOBr}_x\text{I}_{1-x}$  (a, c) and used  $\text{BiOBr}_x\text{I}_{1-x}$  (b, d)

**Figure S8** Recycling experiments of TC and MG on  $\text{BiOBr}_{0.95}\text{I}_{0.05}$  and  $\text{BiOBr}_{0.5}\text{I}_{0.5}$ , respectively

**Figure S9** XRD pattern of  $\text{BiOBr}_{0.5}\text{I}_{0.5}$  (a) and (b)  $\text{BiOBr}_{0.95}\text{I}_{0.05}$  before and after cycles

**Figure S10** Active species trapping experiments of  $20 \text{ mg L}^{-1}$  TC photodegradation over  $\text{BiOBr}_{0.95}\text{I}_{0.05}$  under visible light irradiation

**Figure S11** NBT transformation efficiency on  $\text{BiOI}$ ,  $\text{BiOBr}_{0.5}\text{I}_{0.5}$ ,  $\text{BiOBr}_{0.95}\text{I}_{0.05}$  and  $\text{BiOBr}$  under visible light irradiation

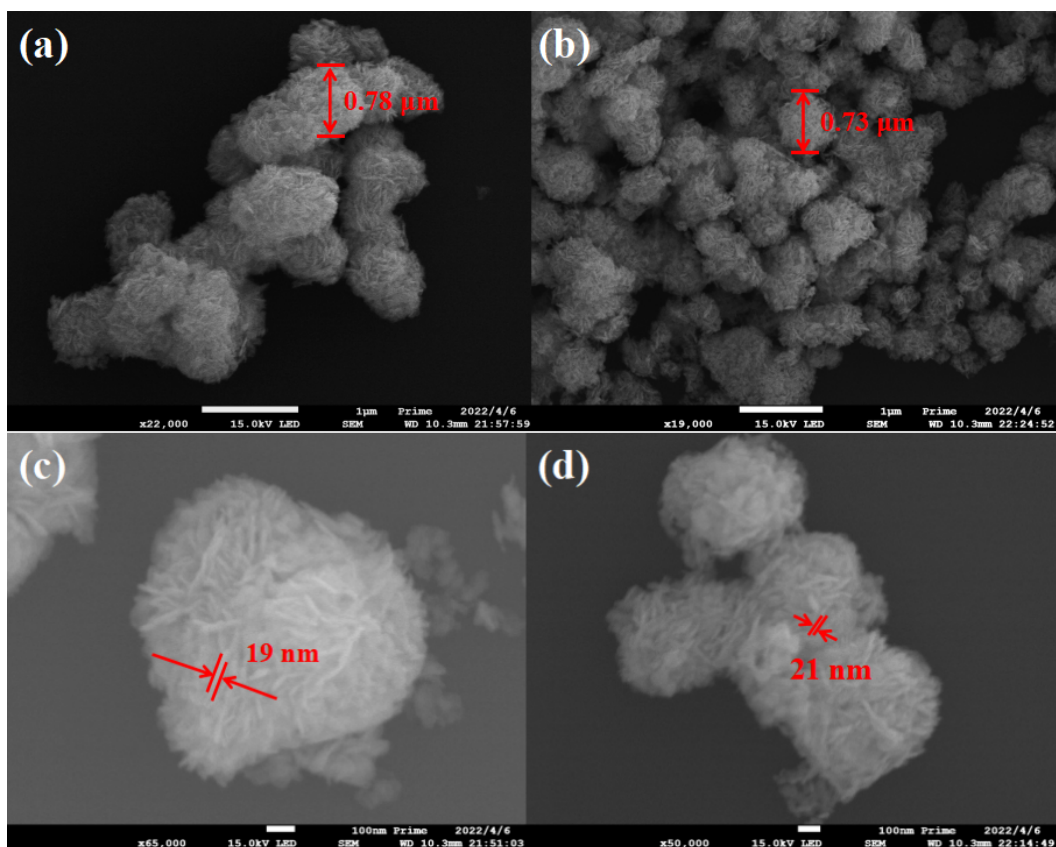

**Figure S12** SEM images of  $\text{BiOBr}_{0.5}\text{I}_{0.5}$  (a, c) and  $\text{BiOBr}_{0.95}\text{I}_{0.05}$  (b, d)

**Fig. S13**  $\text{N}_2$  adsorption-desorption isotherms of  $\text{BiOBr}_{0.25}\text{I}_{0.75}$  (a),  $\text{BiOBr}_{0.5}\text{I}_{0.5}$  (b),  $\text{BiOBr}_{0.75}\text{I}_{0.25}$  (c) and  $\text{BiOBr}_{0.95}\text{I}_{0.05}$  (d), insets showing the corresponding pore size distribution curves and calculated surface areas and mean pore diameters

**Fig. S14** Plots of  $\Delta(\text{pH})$  vs. pH measured for  $\text{BiOBr}_{0.25}\text{I}_{0.75}$  (a),  $\text{BiOBr}_{0.5}\text{I}_{0.5}$  (b),  $\text{BiOBr}_{0.75}\text{I}_{0.25}$  (c) and  $\text{BiOBr}_{0.95}\text{I}_{0.05}$  (d)

**Figure S15** Mott-Schottky curves of  $\text{BiOBr}_{0.95}\text{I}_{0.05}$  at different frequency (a) and  $\text{BiOBr}_x\text{I}_{1-x}$  samples with different  $x$  values (b)

**Figure S16** UV-vis diffuse reflectance spectra (DRS) and the plots of the  $(ah\nu)^{1/2}$  vs. photon energy ( $h\nu$ ) of  $\text{BiOCl}_{0.25}\text{Br}_{0.75}$ ,  $\text{BiOCl}_{0.75}\text{Br}_{0.25}$  (a) and  $\text{BiOCl}_{0.25}\text{I}_{0.75}$ ,  $\text{BiOCl}_{0.8}\text{I}_{0.2}$  (b)

**Figure S17** Mott-Schottky curves of  $\text{BiOCl}_{0.25}\text{Br}_{0.75}$ ,  $\text{BiOCl}_{0.75}\text{Br}_{0.25}$  (a) and  $\text{BiOCl}_{0.25}\text{I}_{0.75}$ ,  $\text{BiOCl}_{0.8}\text{I}_{0.2}$  (b)

**Table S5** The fitting values of each component in the equivalent circuit diagram

| $x$ values    | 0       | 0.5    | 0.95    | 1      |
|---------------|---------|--------|---------|--------|
| $R_1(\Omega)$ | 29.13   | 8.766  | 13.41   | 16.43  |
| $R_2(\Omega)$ | 10334   | 2116   | 779.2   | 3694   |
| CPE-T         | 3.94E-5 | 2.2E-3 | 1.64E-4 | 6.9E-4 |
| CPE-P         | 0.86    | 0.35   | 0.71    | 0.79   |

**Table S6** The band potentials and band gap energy of  $\text{BiOCl}_{0.25}\text{Br}_{0.75}$ ,  $\text{BiOCl}_{0.75}\text{Br}_{0.25}$ ,  $\text{BiOCl}_{0.25}\text{I}_{0.75}$  and  $\text{BiOCl}_{0.8}\text{I}_{0.2}$

| Samples                               | $E_g$ (eV) | $E_{CB}$ (V) | $E_{VB}$ (V) |
|---------------------------------------|------------|--------------|--------------|
| $\text{BiOCl}_{0.25}\text{Br}_{0.75}$ | 2.48       | -0.57        | 1.91         |
| $\text{BiOCl}_{0.75}\text{Br}_{0.25}$ | 2.89       | -0.61        | 2.28         |
| $\text{BiOCl}_{0.25}\text{I}_{0.75}$  | 1.97       | -0.18        | 1.79         |
| $\text{BiOCl}_{0.8}\text{I}_{0.2}$    | 2.29       | -0.11        | 2.18         |

**Figure S18** Band structures of  $\text{BiOCl}_{0.25}\text{I}_{0.75}$ ,  $\text{BiOCl}_{0.8}\text{I}_{0.2}$ ,  $\text{BiOCl}_{0.25}\text{Br}_{0.75}$ ,  $\text{BiOCl}_{0.75}\text{Br}_{0.25}$  and the oxidation potential of MG, MV, TC and RhB
